# Supplementary material
Source: PubMed Central journal article supplement (PMC3486561)
Supplement: AAC.01519-12_zac999101383so1.pdf [file AAC.01519-12_zac999101383so1.pdf]

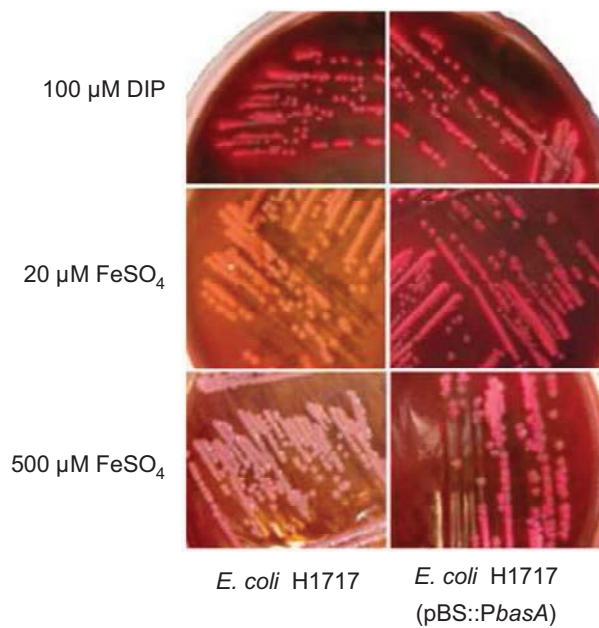

**FIG S1** FURTA assay. Introduction of pBSPbasA into *E. coli* H1717 produced red (Lac<sup>+</sup>) colonies on McConkey agar supplemented with  $\geq 20 \mu\text{M}$  FeSO<sub>4</sub> concentrations, while *E. coli* H1717 gave white (Lac<sup>-</sup>) colonies on McConkey agar at the same FeSO<sub>4</sub> concentrations. The addition of 100  $\mu\text{M}$  DIP restored the Lac<sup>+</sup> phenotype both in *E. coli* H1717(pBSPbasA) and *E. coli* H1717.

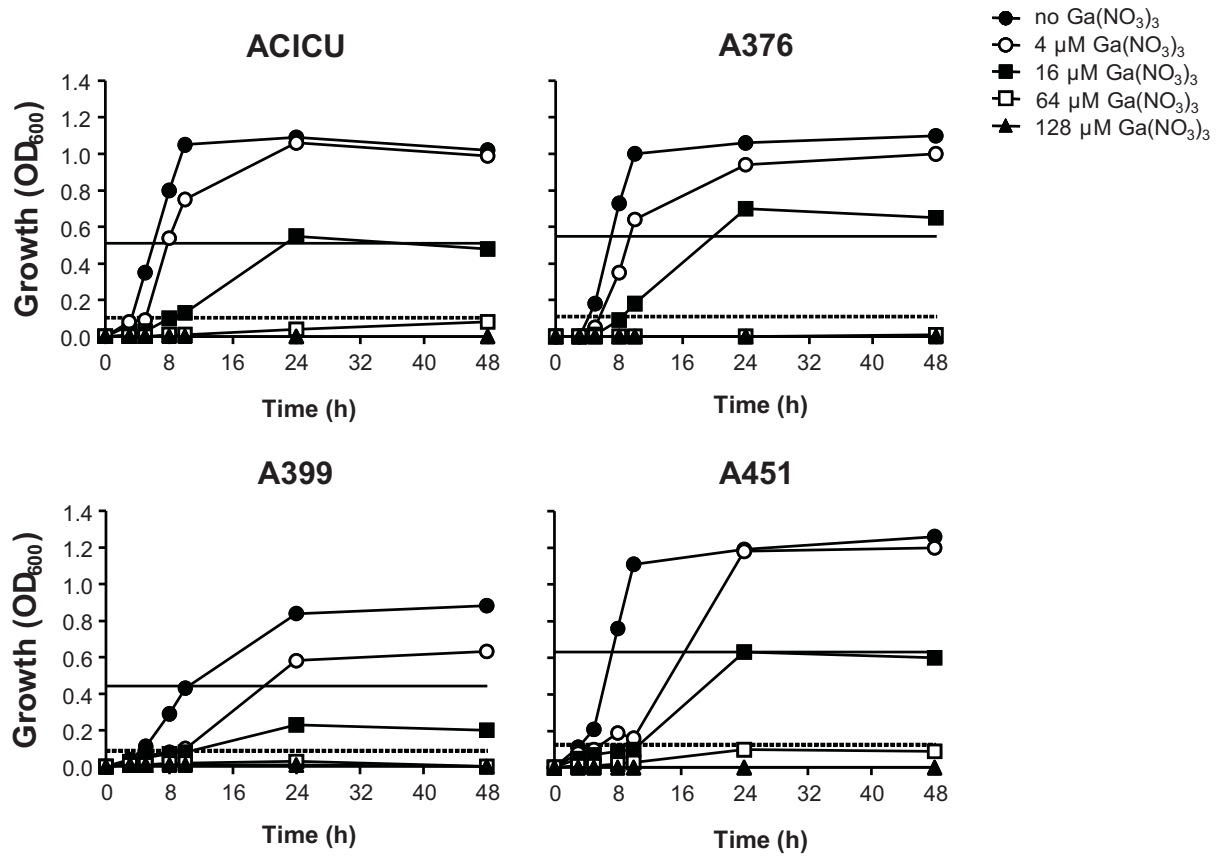

**FIG S2** Effect of Ga(NO<sub>3</sub>)<sub>3</sub> on *A. baumannii* growth in flask culture. Selected strains were grown for up to 48 h in M9-DIP supplemented with increasing Ga(NO<sub>3</sub>)<sub>3</sub> concentrations (0 to 128 μM). Solid and dotted lines show OD<sub>600</sub> values corresponding to 50% and 90% growth inhibition at 48 h relative to the untreated controls, respectively.

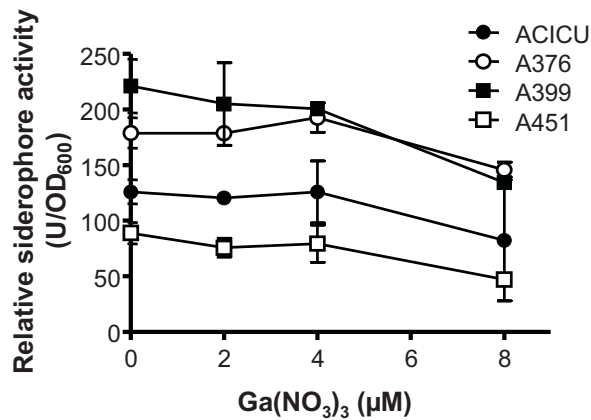

**FIG S3** Effect of Ga(NO<sub>3</sub>)<sub>3</sub> on siderophore production. Siderophore production by *A. baumannii* strains ACICU, A376, A399 and A451 after 48 h growth in M9-DIP supplemented with different Ga(NO<sub>3</sub>)<sub>3</sub> concentrations (0, 2, 4, and 8 μM).

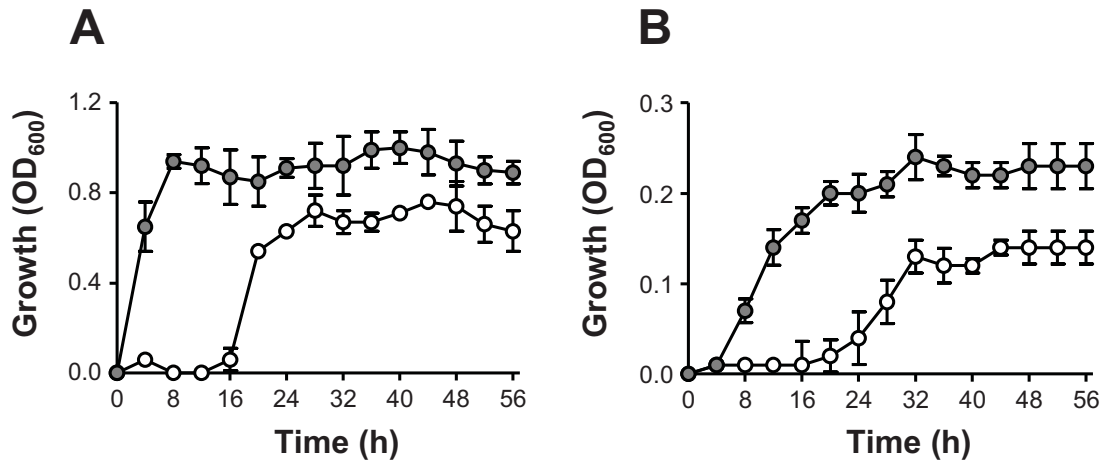

**FIG S4** Growth of *A. baumannii* ACICU in human serum in flasks (A) and microtiter plates (B). White symbols: serum without added iron; grey symbols: serum supplemented with 200  $\mu\text{M}$   $\text{FeCl}_3$ . Data are the means ( $\pm$  SD) of two independent experiments.

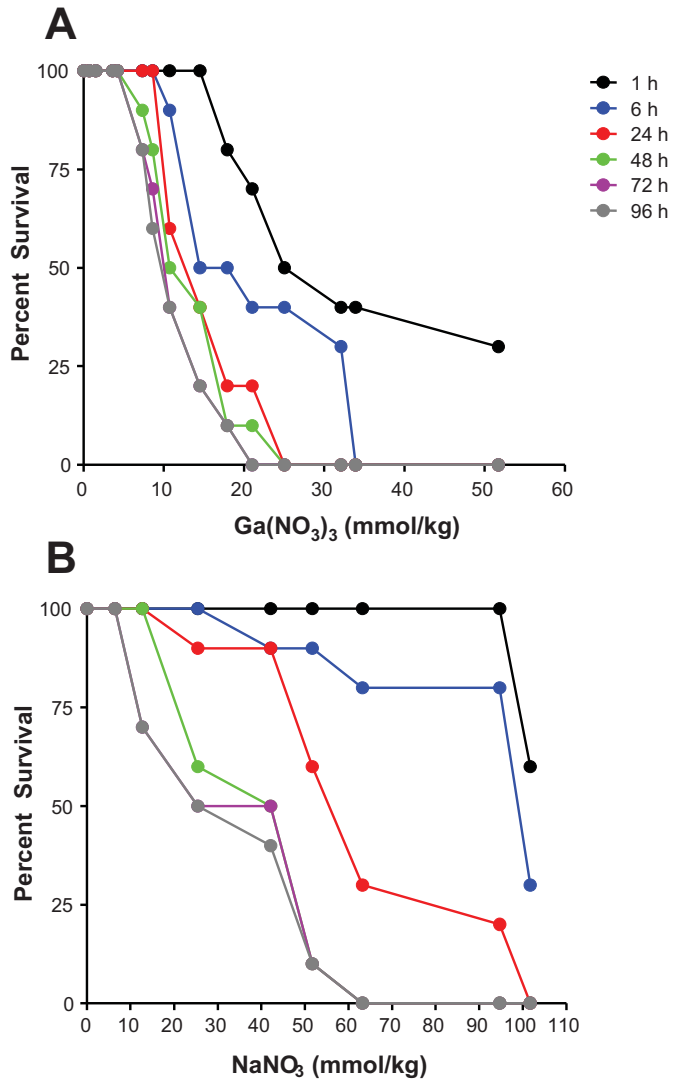

**FIG S5** Toxicity of Ga(NO<sub>3</sub>)<sub>3</sub> (A) and NaNO<sub>3</sub> (B) to *G. mellonella* larvae incubated at 37°C for up to 96 h. Concentrations 0-52 mmol/kg (corresponding to 0-3.0 M) Ga(NO<sub>3</sub>)<sub>3</sub> and 0-102 mmol/kg (corresponding to 0-6.0 M) NaNO<sub>3</sub> were tested.

**TABLE S1** Characteristics of *A. baumannii* strains used in this study

| Strain                  | Country of origin | Sequence group (SG) <sup>a</sup> and relevant characteristics | Reference |
|-------------------------|-------------------|---------------------------------------------------------------|-----------|
| ATCC 19606 <sup>T</sup> | United States     | SG5; type strain                                              |           |
| ATCC 17978              | France            | NV <sup>b</sup> ; complete genome sequenced                   | 6         |
| RUH 875                 | The Netherlands   | SG2; representative for ICL I                                 | 5         |
| RUH 134                 | The Netherlands   | SG1; representative for ICL II                                | 5         |
| RUH 5875                | The Netherlands   | SG3; representative for ICL III                               | 10        |
| AYE                     | France            | SG2; related to ICL I, complete genome sequenced              | 9         |
| ACICU                   | Italy             | SG1; related to ICL II, complete genome sequenced             | 4         |
| 50C                     | Italy             | SG4; related to ICL II, colistin resistant                    | 2, 3      |
| A37                     | Singapore         | SG8                                                           | 1, 7      |
| A60                     | Argentina         | SG1                                                           | 1, 7      |
| A287                    | New Zealand       | SG1                                                           | 1, 7      |
| A369                    | Spain             | SG1                                                           | 1, 7      |
| A371                    | Czech Republic    | SG1                                                           | 1, 7      |
| A372                    | Greece            | SG2                                                           | 1, 7      |
| A374                    | The Netherlands   | SG4                                                           | 1, 7      |
| A376                    | Austria           | SG5                                                           | 1, 7      |
| A377                    | Germany           | SG3                                                           | 1, 7      |
| A380                    | United Kingdom    | SG1                                                           | 1, 7      |
| A384                    | Sweden            | SG2                                                           | 1, 7      |
| A386                    | Greece            | SG2                                                           | 1, 7      |
| A387                    | Greece            | SG1                                                           | 1, 7      |
| A388                    | Greece            | SG7                                                           | 1, 7      |
| A389                    | Denmark           | SG5                                                           | 1, 7      |
| A390                    | Bulgaria          | SG2                                                           | 1, 7      |
| A392                    | Germany           | SG1                                                           | 1, 7      |
| A397                    | Greece            | SG1                                                           | 1, 7      |
| A399                    | Turkey            | SG4                                                           | 1, 7      |
| A402                    | Taiwan            | SG1                                                           | 1, 7      |
| A404                    | Poland            | SG2                                                           | 1, 7      |
| A410                    | Poland            | SG1                                                           | 1, 7      |
| A411                    | Poland            | SG2                                                           | 1, 7      |
| A414                    | Poland            | SG2                                                           | 1, 7      |
| A416                    | Poland            | SG1                                                           | 1, 7      |
| A424                    | Croatia           | SG2                                                           | 1, 7      |
| A429                    | Croatia           | SG2                                                           | 1, 7      |

|      |                                        |     |      |
|------|----------------------------------------|-----|------|
| A430 | Croatia                                | SG2 | 1, 7 |
| A435 | Croatia                                | SG2 | 1, 7 |
| A436 | Croatia                                | SG2 | 1, 7 |
| A437 | Croatia                                | SG2 | 1, 7 |
| A438 | Bulgaria                               | SG2 | 1, 7 |
| A440 | Bulgaria                               | SG2 | 1, 7 |
| A443 | Slovenia                               | SG2 | 1, 7 |
| A451 | Poland                                 | SG2 | 1, 7 |
| A453 | Slovakia                               | SG1 | 1, 7 |
| A457 | Estonia                                | SG7 | 1, 7 |
| A458 | Estonia                                | SG2 | 1, 7 |
| A461 | Portugal                               | SG4 | 1, 7 |
| A462 | Portugal                               | SG4 | 1, 7 |
| A464 | Portugal                               | SG4 | 1, 7 |
| A468 | Poland                                 | SG1 | 1, 7 |
| A469 | Poland                                 | SG2 | 1, 7 |
| A472 | Poland                                 | SG2 | 1, 7 |
| A473 | Poland                                 | SG1 | 1, 7 |
| A474 | Poland                                 | SG1 | 1, 7 |
| A479 | United Kingdom<br>import from Pakistan | SG2 | 1, 7 |
| A483 | United Kingdom<br>import from Malaysia | SG4 | 1, 7 |
| A486 | Brazil                                 | SG4 | 1, 7 |
| A491 | India                                  | SG1 | 1, 7 |

---

<sup>a</sup> SG determination was performed as previously described (Turton *et al.*, 2007).

<sup>b</sup> NV, new variant SG (4).

## REFERENCES

1. **Antunes LC, Imperi F, Towner KJ, Visca P.** 2011. Genome-assisted identification of putative iron-utilization genes in *Acinetobacter baumannii* and their distribution among a genotypically diverse collection of clinical isolates. *Res Microbiol.* **162**:279-284.

2. **D'Andrea MM, Giani T, D'Arezzo S, Capone A, Petrosillo N, Visca P, Luzzaro F, Rossolini GM.** 2009. Characterization of pABVA01, a plasmid encoding the OXA-24 carbapenemase from Italian isolates of *Acinetobacter baumannii*. *Antimicrob. Agents Chemother.* **53**:3528-3533.
3. **D'Arezzo S, Capone A, Petrosillo N, Visca P; GRAB.** 2009. Epidemic multidrug-resistant *Acinetobacter baumannii* related to European clonal types I and II in Rome (Italy). *Clin. Microbiol. Infect.* **15**:347-357.
4. **Iacono M, Villa L, Fortini D, Bordoni R, Imperi F, Bonnal RJ, Sicheritz-Ponten T, De Bellis G, Visca P, Cassone A, Carattoli A.** 2008. Whole-genome pyrosequencing of an epidemic multidrug-resistant *Acinetobacter baumannii* strain belonging to the European clone II group. *Antimicrob. Agents Chemother.* **52**:2616-2625.
5. **Nemec A, Dijkshoorn L, van der Reijden TJ.** 2004. Long-term predominance of two pan-European clones among multi-resistant *Acinetobacter baumannii* strains in the Czech Republic. *J. Med. Microbiol.* **2**:147–153.
6. **Smith MG, Gianoulis TA, Pukatzki S, Mekalanos JJ, Ornston LN, Gerstein M, Snyder M.** 2007. New insights into *Acinetobacter baumannii* pathogenesis revealed by high-density pyrosequencing and transposon mutagenesis. *Genes Dev.* **21**:601-614.
7. **Towner KJ, Levi K, Vlassiadi M; ARPAC Steering Group.** 2008. Genetic diversity of carbapenem-resistant isolates of *Acinetobacter baumannii* in Europe. *Clin. Microbiol. Infect.* **14**:161-167.
8. **Turton JF, Gabriel SN, Valderrey C, Kaufmann ME, Pitt TL.** 2007. Use of sequence-based typing and multiplex PCR to identify clonal lineages of outbreak strains of *Acinetobacter baumannii*. *Clin. Microbiol. Infect.* **8**:807–815.
9. **Vallenet D, Nordmann P, Barbe V, Poirel L, Mangenot S, Bataille E, Dossat C, Gas S, Kreimeyer A, Lenoble P, Oztas S, Poulain J, Segurens B, Robert C, Abergel C, Claverie JM,**



**Raoult D, Médigue C, Weissenbach J, Cruveiller S.** 2008. Comparative analysis of Acinetobacters: three genomes for three lifestyles. PLoS One. **3**:e1805.

10. **van Dessel H, Dijkshoorn L, van der Reijden T, Bakker N, Paauw A, van den Broek P, Verhoef J, Brisse S.** 2004. Identification of a new geographically widespread multiresistant *Acinetobacter baumannii* clone from European hospitals. Res. Microbiol. **2**:105-112.

**TABLE S2** Ga(NO<sub>3</sub>)<sub>3</sub> inhibitory concentrations (IC<sub>50</sub> and IC<sub>90</sub>, μM) at 24 and 48 h in a collection of 58

*A. baumannii* strains cultivated in M9-DIP. Results are the means (± SD) of two independent experiments.

| Strain                  | 24 h <sup>a</sup> |            |                  |            | 48 h             |           |                  |  |
|-------------------------|-------------------|------------|------------------|------------|------------------|-----------|------------------|--|
|                         | IC <sub>50</sub>  |            | IC <sub>90</sub> |            | IC <sub>50</sub> |           | IC <sub>90</sub> |  |
| ATCC 19606 <sup>T</sup> | ND                |            | ND               |            | 2.8 ± 1.4        | 5.6 ± 2.2 |                  |  |
| ATCC 17978              | 9.8 ± 2.9         | 47.9 ± 6.4 |                  | 22.7 ± 3.3 | 53.2 ± 4.6       |           |                  |  |
| RUH 875                 | 5.7 ± 1.5         | 26.4 ± 1.1 |                  | 11.6 ± 5.4 | 58.5 ± 7.4       |           |                  |  |
| RUH 134                 | 6.9 ± 0.2         | 31.6 ± 0.6 |                  | 20.3 ± 8.3 | 51.1 ± 2.1       |           |                  |  |
| RUH 5875                | 1.1 ± 0.3         | 3.1 ± 0.2  |                  | 3.3 ± 0.4  | 14.0 ± 3.3       |           |                  |  |
| AYE                     | 4.7 ± 0.8         | 32.4 ± 0.6 |                  | 1.9 ± 0.1  | 9.8 ± 3.2        |           |                  |  |
| ACICU                   | 4.6 ± 1.8         | 15.9 ± 1.6 |                  | 13.0 ± 3.3 | 35.9 ± 5.4       |           |                  |  |
| 50C                     | 7.5 ± 0.6         | 56.8 ± 6.2 |                  | 22.5 ± 1.3 | 64.0 ± 0.0       |           |                  |  |
| A37                     | 6.4 ± 0.1         | 21.8 ± 2.5 |                  | 11.2 ± 1.4 | 35.2 ± 5.0       |           |                  |  |
| A60                     | 3.9 ± 0.0         | 35.2 ± 6.5 |                  | 13.2 ± 0.7 | 49.1 ± 3.5       |           |                  |  |
| A287                    | 5.0 ± 1.5         | 12.1 ± 2.8 |                  | 8.7 ± 1.6  | 30.6 ± 1.3       |           |                  |  |
| A369                    | 2.6 ± 2.1         | 5.5 ± 2.5  |                  | 6.3 ± 0.3  | 17.7 ± 3.7       |           |                  |  |
| A371                    | 3.7 ± 0.2         | 14.7 ± 1.3 |                  | 13.3 ± 1.4 | 45.9 ± 2.7       |           |                  |  |
| A372                    | 6.2 ± 0.4         | 17.4 ± 2.5 |                  | 11.9 ± 1.3 | 36.0 ± 5.7       |           |                  |  |
| A374                    | 1.2 ± 0.1         | 2.7 ± 1.3  |                  | 1.2 ± 0.1  | 2.6 ± 0.8        |           |                  |  |
| A376                    | 14.7 ± 1.6        | 45.7 ± 3.0 |                  | 27.9 ± 1.8 | 57.2 ± 0.6       |           |                  |  |
| A377                    | 5.1 ± 2.3         | 17.7 ± 6.2 |                  | 14.1 ± 2.3 | 49.6 ± 6.6       |           |                  |  |
| A380                    | 1.3 ± 0.1         | 3.3 ± 0.2  |                  | 1.9 ± 0.3  | 9.0 ± 2.8        |           |                  |  |
| A384                    | 4.4 ± 0.9         | 24.5 ± 0.5 |                  | 13.5 ± 0.8 | 31.7 ± 4.9       |           |                  |  |
| A386                    | 2.6 ± 0.1         | 9.4 ± 3.8  |                  | 8.5 ± 2.1  | 21.0 ± 8.6       |           |                  |  |
| A387                    | 5.0 ± 3.2         | 17.4 ± 8.3 |                  | 2.2 ± 1.1  | 18.0 ± 6.4       |           |                  |  |
| A388                    | 2.2 ± 0.3         | 13.8 ± 2.9 |                  | 6.5 ± 0.2  | 25.4 ± 1.3       |           |                  |  |
| A389                    | 2.7 ± 0.3         | 10.2 ± 4.1 |                  | 6.1 ± 0.4  | 16.4 ± 2.3       |           |                  |  |
| A390                    | 6.0 ± 0.2         | 15.4 ± 0.6 |                  | 11.0 ± 0.1 | 25.9 ± 5.6       |           |                  |  |
| A392                    | 3.3 ± 0.8         | 15.5 ± 6.2 |                  | 4.2 ± 2.5  | 13.6 ± 2.0       |           |                  |  |
| A397                    | 1.0 ± 0.1         | 1.7 ± 0.1  |                  | 1.3 ± 0.0  | 2.5 ± 0.7        |           |                  |  |
| A399                    | 7.8 ± 0.2         | 34.6 ± 0.5 |                  | 15.3 ± 0.4 | 35.2 ± 5.9       |           |                  |  |
| A402                    | 1.7 ± 0.1         | 16.6 ± 4.3 |                  | 1.4 ± 0.1  | 12.3 ± 3.0       |           |                  |  |
| A404                    | 2.8 ± 0.5         | 5.6 ± 0.8  |                  | 12.4 ± 0.5 | 18.5 ± 3.6       |           |                  |  |
| A410                    | 1.3 ± 0.2         | 4.6 ± 3.0  |                  | 3.4 ± 0.1  | 13.2 ± 1.7       |           |                  |  |
| A411                    | 7.3 ± 0.3         | 19.3 ± 5.3 |                  | 19.9 ± 6.5 | 56.7 ± 8.8       |           |                  |  |
| A414                    | 3.3 ± 0.0         | 6.4 ± 0.5  |                  | 8.0 ± 0.5  | 24.5 ± 4.2       |           |                  |  |
| A416                    | 1.2 ± 0.1         | 8.0 ± 0.2  |                  | 1.4 ± 0.1  | 3.7 ± 0.1        |           |                  |  |
| A424                    | 3.0 ± 0.7         | 12.7 ± 2.8 |                  | 9.0 ± 2.5  | 21.2 ± 0.9       |           |                  |  |
| A429                    | 1.5 ± 0.1         | 6.4 ± 1.9  |                  | 9.4 ± 3.9  | 18.6 ± 5.4       |           |                  |  |
| A430                    | 4.9 ± 1.8         | 14.0 ± 0.6 |                  | 13.0 ± 0.4 | 28.9 ± 2.4       |           |                  |  |

|      |     |   |     |      |   |     |      |   |     |      |   |     |
|------|-----|---|-----|------|---|-----|------|---|-----|------|---|-----|
| A435 | 1.4 | ± | 0.1 | 1.9  | ± | 0.1 | 1.3  | ± | 0.1 | 3.0  | ± | 0.6 |
| A436 | 1.2 | ± | 0.2 | 12.5 | ± | 1.7 | 10.8 | ± | 3.0 | 28.9 | ± | 4.5 |
| A437 | 1.3 | ± | 0.1 | 2.6  | ± | 0.8 | 4.3  | ± | 1.3 | 11.8 | ± | 0.4 |
| A438 | 1.3 | ± | 0.1 | 3.0  | ± | 1.4 | 1.5  | ± | 0.7 | 4.4  | ± | 1.7 |
| A440 | 1.2 | ± | 0.0 | 2.0  | ± | 0.0 | 1.6  | ± | 0.3 | 10.3 | ± | 3.4 |
| A443 | ND  |   |     | ND   |   |     | 3.9  | ± | 3.0 | 15.5 | ± | 4.9 |
| A451 | 6.5 | ± | 0.5 | 23.1 | ± | 3.0 | 15.7 | ± | 1.1 | 34.5 | ± | 2.1 |
| A453 | 1.4 | ± | 0.3 | 4.2  | ± | 3.0 | 6.5  | ± | 0.0 | 23.8 | ± | 0.2 |
| A457 | 1.3 | ± | 0.1 | 8.8  | ± | 1.1 | 5.4  | ± | 2.5 | 24.6 | ± | 1.7 |
| A458 | 1.3 | ± | 0.1 | 2.1  | ± | 0.1 | 1.2  | ± | 0.3 | 11.6 | ± | 6.3 |
| A461 | ND  |   |     | ND   |   |     | 27.5 | ± | 3.5 | 80.0 | ± | 4.2 |
| A462 | 4.2 | ± | 0.6 | 19.9 | ± | 3.5 | 13.3 | ± | 1.3 | 46.3 | ± | 1.6 |
| A464 | 1.5 | ± | 0.1 | 7.8  | ± | 1.7 | 3.3  | ± | 0.2 | 19.3 | ± | 6.9 |
| A468 | 2.2 | ± | 0.9 | 4.4  | ± | 0.6 | 3.3  | ± | 0.1 | 13.6 | ± | 1.2 |
| A469 | 2.1 | ± | 1.0 | 4.8  | ± | 0.0 | 2.9  | ± | 0.4 | 7.2  | ± | 1.1 |
| A472 | 7.6 | ± | 0.4 | 41.8 | ± | 1.5 | 10.8 | ± | 0.4 | 15.7 | ± | 0.5 |
| A473 | ND  |   |     | ND   |   |     | 3.4  | ± | 0.6 | 14.2 | ± | 1.1 |
| A474 | 6.2 | ± | 1.1 | 25.8 | ± | 3.7 | 18.2 | ± | 4.2 | 39.0 | ± | 7.5 |
| A479 | 4.4 | ± | 1.2 | 15.1 | ± | 1.3 | 10.7 | ± | 0.4 | 27.0 | ± | 6.2 |
| A483 | 3.5 | ± | 0.1 | 13.1 | ± | 4.1 | 11.4 | ± | 0.5 | 29.2 | ± | 0.2 |
| A486 | 1.3 | ± | 0.1 | 2.9  | ± | 1.6 | 6.0  | ± | 4.0 | 61.5 | ± | 7.8 |
| A491 | 3.7 | ± | 0.1 | 37.6 | ± | 8.3 | 11.5 | ± | 1.2 | 63.9 | ± | 6.1 |

---

<sup>a</sup>ND, not determined due to poor growth.

**TABLE S3** Ga(NO<sub>3</sub>)<sub>3</sub> inhibitory concentrations (IC<sub>50</sub> and IC<sub>90</sub>, μM) at 48 h in a collection of 58 *A. baumannii* strains cultivated in human serum. Results are the means (± SD) of two independent experiments.

| Strain                  | IC <sub>50</sub> | IC <sub>90</sub> |
|-------------------------|------------------|------------------|
| ATCC 19606 <sup>T</sup> | ND <sup>a</sup>  | ND <sup>a</sup>  |
| ATCC 17978              | 2.2 ± 0.2        | 3.8 ± 0.0        |
| RUH 875                 | 5.3 ± 0.8        | 14.6 ± 2.1       |
| RUH 134                 | 7.9 ± 0.2        | 15.0 ± 0.4       |
| RUH 5875                | 5.4 ± 0.8        | 14.5 ± 5.2       |
| AYE                     | 5.9 ± 0.4        | 10.7 ± 1.3       |
| ACICU                   | 6.2 ± 0.4        | 14.0 ± 2.1       |
| 50C                     | 9.7 ± 0.5        | 30.4 ± 2.3       |
| A37                     | 12.1 ± 0.4       | 45.3 ± 8.6       |
| A60                     | 3.9 ± 0.1        | 7.7 ± 0.1        |
| A287                    | 23.7 ± 1.7       | 54.5 ± 3.6       |
| A369                    | 26.2 ± 5.5       | 58.4 ± 3.7       |
| A371                    | 34.7 ± 6.4       | 64.0 ± 4.5       |
| A372                    | 16.0 ± 0.1       | 58.0 ± 3.6       |
| A374                    | 2.8 ± 0.4        | 9.3 ± 3.6        |
| A376                    | 3.0 ± 0.1        | 7.0 ± 0.2        |
| A377                    | 2.8 ± 0.8        | 4.0 ± 0.0        |
| A380                    | 6.2 ± 0.8        | 7.6 ± 0.3        |
| A384                    | 12.7 ± 1.1       | 37.2 ± 6.9       |
| A386                    | 5.5 ± 1.0        | 9.4 ± 1.8        |
| A387                    | 5.2 ± 0.3        | 8.6 ± 0.3        |
| A388                    | 6.8 ± 0.8        | 15.0 ± 1.5       |
| A389                    | 5.7 ± 2.7        | 18.7 ± 3.7       |
| A390                    | 5.8 ± 2.5        | 15.5 ± 0.6       |
| A392                    | 12.4 ± 0.6       | 26.6 ± 0.2       |
| A397                    | 7.1 ± 1.8        | 14.4 ± 2.3       |
| A399                    | 21.0 ± 5.7       | 58.7 ± 5.9       |
| A402                    | 5.0 ± 1.3        | 17.2 ± 1.6       |
| A404                    | 4.2 ± 0.1        | 15.4 ± 0.4       |
| A410                    | 2.5 ± 0.1        | 6.7 ± 0.5        |
| A411                    | 6.3 ± 3.3        | 13.2 ± 3.4       |
| A414                    | 12.9 ± 2.1       | 29.1 ± 0.9       |
| A416                    | 3.7 ± 0.4        | 13.7 ± 0.6       |
| A424                    | 6.0 ± 0.3        | 15.2 ± 1.2       |
| A429                    | 2.5 ± 0.7        | 4.0 ± 0.4        |
| A430                    | 6.0 ± 0.3        | 16.2 ± 2.1       |
| A435                    | 6.0 ± 1.2        | 27.0 ± 6.2       |

|      |            |             |
|------|------------|-------------|
| A436 | 1.6 ± 0.3  | 5.3 ± 0.4   |
| A437 | 7.8 ± 3.2  | 40.5 ± 14.7 |
| A438 | 7.4 ± 0.1  | 20.6 ± 0.4  |
| A440 | 3.8 ± 0.7  | 9.0 ± 2.1   |
| A443 | 9.3 ± 0.4  | 26.9 ± 2.6  |
| A451 | 12.2 ± 0.5 | 48.2 ± 1.1  |
| A453 | 6.4 ± 0.0  | 13.3 ± 0.0  |
| A457 | 4.9 ± 2.5  | 11.8 ± 5.2  |
| A458 | 8.9 ± 1.2  | 21.2 ± 1.7  |
| A461 | 4.0 ± 0.1  | 13.2 ± 2.3  |
| A462 | 3.3 ± 0.3  | 7.7 ± 0.2   |
| A464 | 11.0 ± 0.6 | 31.8 ± 2.1  |
| A468 | 13.0 ± 3.0 | 32.5 ± 0.6  |
| A469 | 24.3 ± 2.6 | 63.9 ± 9.1  |
| A472 | 4.0 ± 0.3  | 7.5 ± 0.4   |
| A473 | 4.8 ± 0.3  | 13.2 ± 1.6  |
| A474 | 2.6 ± 0.2  | 5.1 ± 1.0   |
| A479 | 3.0 ± 0.1  | 7.1 ± 0.4   |
| A483 | 7.1 ± 0.7  | 12.5 ± 2.3  |
| A486 | 5.4 ± 0.3  | 10.2 ± 0.2  |
| A491 | 6.7 ± 1.3  | 14.0 ± 2.3  |

---

<sup>a</sup> ND, not determined due to poor growth.

**TABLE S4** Growth yields and relative siderophore production at 24 and 48 h in a collection of 58 *A. baumannii* strains cultivated in microtiter plates in M9-DIP supplemented or not with 100  $\mu$ M FeCl<sub>3</sub>.

| Strain                  | Growth (OD <sub>600</sub> ) |                            |             |                            | Relative siderophore production (U/OD <sub>600</sub> ) <sup>d</sup> |                            |               |                            |
|-------------------------|-----------------------------|----------------------------|-------------|----------------------------|---------------------------------------------------------------------|----------------------------|---------------|----------------------------|
|                         | 24 h                        |                            | 48 h        |                            | 24 h                                                                |                            | 48 h          |                            |
|                         | M9-DIP                      | M9-DIP + FeCl <sub>3</sub> | M9-DIP      | M9-DIP + FeCl <sub>3</sub> | M9-DIP                                                              | M9-DIP + FeCl <sub>3</sub> | M9-DIP        | M9-DIP + FeCl <sub>3</sub> |
| ATCC 19606 <sup>T</sup> | 0.08 ± 0.01                 | 0.35 ± 0.08                | 0.09 ± 0.01 | 0.32 ± 0.01                | 3.33 ± 2.1                                                          | ND                         | 38.3 ± 2.92   | ND                         |
| ATCC 17978              | 0.38 ± 0.02                 | 0.41 ± 0.09                | 0.26 ± 0.03 | 0.41 ± 0.05                | 65.30 ± 2.16                                                        | ND                         | 75.00 ± 7.0   | ND                         |
| RUH 875                 | 0.09 ± 0.01                 | 0.28 ± 0.01                | 0.09 ± 0.01 | 0.25 ± 0.02                | 112.90 ± 12.29                                                      | ND                         | 129.84 ± 7.3  | ND                         |
| RUH 134                 | 0.11 ± 0.01                 | 0.47 ± 0.02                | 0.13 ± 0.01 | 0.42 ± 0.02                | 90.80 ± 18.01                                                       | ND                         | 104.42 ± 15.4 | ND                         |
| RUH 5875                | 0.24 ± 0.03                 | 0.35 ± 0.06                | 0.22 ± 0.02 | 0.40 ± 0.02                | 200.10 ± 15.43                                                      | ND                         | 210.10 ± 11.1 | ND                         |
| AYE                     | 0.24 ± 0.07                 | 0.42 ± 0.01                | 0.24 ± 0.04 | 0.34 ± 0.01                | 155.30 ± 3.45                                                       | ND                         | 178.80 ± 5.1  | ND                         |
| ACICU                   | 0.32 ± 0.01                 | 0.46 ± 0.03                | 0.31 ± 0.02 | 0.40 ± 0.05                | 90.70 ± 2.58                                                        | ND                         | 126.00 ± 6.5  | ND                         |
| 50C                     | 0.11 ± 0.01                 | 0.41 ± 0.01                | 0.13 ± 0.01 | 0.49 ± 0.01                | 119.90 ± 5.00                                                       | ND                         | 136.00 ± 8.5  | ND                         |
| A37                     | 0.30 ± 0.09                 | 0.41 ± 0.03                | 0.21 ± 0.03 | 0.37 ± 0.03                | 122.70 ± 6.54                                                       | ND                         | 141.11 ± 3.4  | ND                         |
| A60                     | 0.33 ± 0.01                 | 0.44 ± 0.04                | 0.31 ± 0.03 | 0.37 ± 0.01                | 139.70 ± 11.63                                                      | ND                         | 160.66 ± 4.4  | ND                         |
| A287                    | 0.34 ± 0.07                 | 0.36 ± 0.03                | 0.33 ± 0.02 | 0.40 ± 0.03                | 138.00 ± 7.95                                                       | ND                         | 158.70 ± 4.2  | ND                         |
| A369                    | 0.36 ± 0.01                 | 0.35 ± 0.02                | 0.28 ± 0.01 | 0.32 ± 0.02                | 216.60 ± 3.62                                                       | ND                         | 249.09 ± 16.2 | ND                         |
| A371                    | 0.23 ± 0.04                 | 0.46 ± 0.04                | 0.16 ± 0.02 | 0.38 ± 0.03                | 189.90 ± 5.44                                                       | ND                         | 113.00 ± 2.5  | ND                         |
| A372                    | 0.25 ± 0.04                 | 0.33 ± 0.01                | 0.22 ± 0.02 | 0.30 ± 0.07                | 102.90 ± 4.80                                                       | ND                         | 118.30 ± 4.1  | ND                         |
| A374                    | 0.37 ± 0.05                 | 0.41 ± 0.03                | 0.27 ± 0.01 | 0.37 ± 0.03                | 42.20 ± 9.42                                                        | ND                         | 48.50 ± 6.1   | ND                         |
| A376                    | 0.29 ± 0.02                 | 0.37 ± 0.03                | 0.24 ± 0.01 | 0.36 ± 0.06                | 153.90 ± 2.81                                                       | ND                         | 178.90 ± 5.0  | ND                         |
| A377                    | 0.29 ± 0.01                 | 0.39 ± 0.02                | 0.25 ± 0.02 | 0.35 ± 0.02                | 155.10 ± 3.16                                                       | ND                         | 138.10 ± 12.2 | ND                         |
| A380                    | 0.19 ± 0.05                 | 0.39 ± 0.01                | 0.19 ± 0.01 | 0.35 ± 0.03                | 120.10 ± 4.64                                                       | ND                         | 287.60 ± 27.1 | ND                         |
| A384                    | 0.40 ± 0.01                 | 0.52 ± 0.01                | 0.36 ± 0.04 | 0.47 ± 0.03                | 250.10 ± 18.01                                                      | ND                         | 137.20 ± 13.4 | ND                         |
| A386                    | 0.17 ± 0.03                 | 0.37 ± 0.01                | 0.15 ± 0.01 | 0.33 ± 0.02                | 119.30 ± 1.87                                                       | ND                         | 89.80 ± 14.6  | ND                         |
| A387                    | 0.23 ± 0.07                 | 0.50 ± 0.04                | 0.21 ± 0.02 | 0.48 ± 0.03                | 78.10 ± 2.96                                                        | ND                         | 128.90 ± 7.4  | ND                         |
| A388                    | 0.18 ± 0.02                 | 0.40 ± 0.01                | 0.18 ± 0.01 | 0.32 ± 0.02                | 112.10 ± 6.74                                                       | ND                         | 135.00 ± 17.6 | ND                         |
| A389                    | 0.16 ± 0.03                 | 0.53 ± 0.01                | 0.16 ± 0.06 | 0.56 ± 0.05                | 117.40 ± 3.56                                                       | ND                         | 255.50 ± 17.2 | ND                         |
| A390                    | 0.09 ± 0.01                 | 0.35 ± 0.02                | 0.15 ± 0.01 | 0.32 ± 0.03                | 222.20 ± 13.50                                                      | ND                         | 202.10 ± 6.9  | ND                         |
| A392                    | 0.23 ± 0.01                 | 0.45 ± 0.01                | 0.16 ± 0.01 | 0.42 ± 0.01                | 175.70 ± 20.54                                                      | ND                         | 227.10 ± 19.2 | ND                         |
| A397                    | 0.25 ± 0.06                 | 0.41 ± 0.03                | 0.31 ± 0.04 | 0.37 ± 0.02                | 197.50 ± 12.07                                                      | ND                         | 171.50 ± 6.9  | ND                         |
| A399                    | 0.26 ± 0.01                 | 0.47 ± 0.03                | 0.24 ± 0.03 | 0.33 ± 0.02                | 219.70 ± 12.19                                                      | ND                         | 190.80 ± 14.5 | ND                         |
| A402                    | 0.23 ± 0.01                 | 0.35 ± 0.02                | 0.17 ± 0.04 | 0.32 ± 0.02                | 149.10 ± 8.18                                                       | ND                         | 255.50 ± 8.6  | ND                         |
| A404                    | 0.31 ± 0.02                 | 0.39 ± 0.03                | 0.22 ± 0.02 | 0.34 ± 0.03                | 180.50 ± 12.57                                                      | ND                         | 260.70 ± 4.3  | ND                         |
| A410                    | 0.21 ± 0.01                 | 0.38 ± 0.02                | 0.22 ± 0.05 | 0.33 ± 0.03                | 222.20 ± 13.00                                                      | ND                         | 165.40 ± 1.2  | ND                         |
| A411                    | 0.20 ± 0.02                 | 0.37 ± 0.01                | 0.16 ± 0.03 | 0.37 ± 0.02                | 226.70 ± 5.72                                                       | ND                         | 105.70 ± 4.5  | ND                         |
| A414                    | 0.22 ± 0.03                 | 0.32 ± 0.03                | 0.17 ± 0.02 | 0.29 ± 0.06                | 143.80 ± 13.72                                                      | ND                         | 186.10 ± 5.9  | ND                         |
| A416                    | 0.14 ± 0.02                 | 0.41 ± 0.04                | 0.16 ± 0.02 | 0.39 ± 0.04                | 91.90 ± 5.72                                                        | ND                         | 147.50 ± 6.6  | ND                         |
| A424                    | 0.17 ± 0.01                 | 0.28 ± 0.01                | 0.23 ± 0.01 | 0.29 ± 0.02                | 161.80 ± 16.16                                                      | ND                         | 119.70 ± 1.1  | ND                         |
| A429                    | 0.27 ± 0.01                 | 0.39 ± 0.01                | 0.21 ± 0.03 | 0.35 ± 0.02                | 128.30 ± 6.13                                                       | ND                         | 97.90 ± 8.1   | ND                         |
| A430                    | 0.36 ± 0.03                 | 0.33 ± 0.02                | 0.30 ± 0.03 | 0.32 ± 0.03                | 104.10 ± 3.24                                                       | ND                         | 224.90 ± 4.6  | ND                         |

|      |             |             |             |             |               |    |               |    |
|------|-------------|-------------|-------------|-------------|---------------|----|---------------|----|
| A435 | 0.41 ± 0.02 | 0.42 ± 0.03 | 0.37 ± 0.02 | 0.38 ± 0.02 | 85.10 ± 1.35  | ND | 108.40 ± 10.7 | ND |
| A436 | 0.32 ± 0.01 | 0.40 ± 0.04 | 0.24 ± 0.03 | 0.36 ± 0.01 | 195.60 ± 3.24 | ND | 116.50 ± 7.4  | ND |
| A437 | 0.12 ± 0.01 | 0.28 ± 0.02 | 0.12 ± 0.03 | 0.39 ± 0.03 | 94.30 ± 4.89  | ND | 96.10 ± 6.1   | ND |
| A438 | 0.27 ± 0.02 | 0.37 ± 0.02 | 0.21 ± 0.04 | 0.35 ± 0.02 | 101.30 ± 4.73 | ND | 165.40 ± 2.0  | ND |
| A440 | 0.13 ± 0.02 | 0.29 ± 0.03 | 0.15 ± 0.02 | 0.31 ± 0.02 | 40.10 ± 1.27  | ND | 80.30 ± 2.0   | ND |
| A443 | 0.11 ± 0.01 | 0.30 ± 0.05 | 0.12 ± 0.06 | 0.29 ± 0.01 | 143.80 ± 5.77 | ND | 182.50 ± 3.3  | ND |
| A451 | 0.10 ± 0.02 | 0.47 ± 0.01 | 0.14 ± 0.06 | 0.46 ± 0.01 | 69.80 ± 3.82  | ND | 89.00 ± 14.7  | ND |
| A453 | 0.12 ± 0.10 | 0.16 ± 0.02 | 0.12 ± 0.02 | 0.24 ± 0.03 | 158.70 ± 7.65 | ND | 182.51 ± 3.1  | ND |
| A457 | 0.28 ± 0.01 | 0.44 ± 0.03 | 0.33 ± 0.03 | 0.40 ± 0.03 | 240.0 ± 8.27  | ND | 276.00 ± 10.2 | ND |
| A458 | 0.20 ± 0.03 | 0.41 ± 0.01 | 0.18 ± 0.03 | 0.39 ± 0.02 | 184.9 ± 4.59  | ND | 212.64 ± 35.6 | ND |
| A461 | 0.29 ± 0.01 | 0.44 ± 0.01 | 0.25 ± 0.01 | 0.41 ± 0.01 | 233.8 ± 1.70  | ND | 268.87 ± 3.6  | ND |
| A462 | 0.21 ± 0.02 | 0.30 ± 0.01 | 0.16 ± 0.03 | 0.32 ± 0.03 | 156.3 ± 1.46  | ND | 179.75 ± 3.6  | ND |
| A464 | 0.30 ± 0.01 | 0.33 ± 0.01 | 0.23 ± 0.01 | 0.31 ± 0.01 | 155.8 ± 2.94  | ND | 179.17 ± 2.7  | ND |
| A468 | 0.31 ± 0.03 | 0.33 ± 0.03 | 0.26 ± 0.02 | 0.26 ± 0.01 | 167.0 ± 10.47 | ND | 192.05 ± 1.7  | ND |
| A469 | 0.30 ± 0.03 | 0.44 ± 0.03 | 0.27 ± 0.02 | 0.39 ± 0.02 | 180.3 ± 2.61  | ND | 207.35 ± 7.9  | ND |
| A472 | 0.11 ± 0.04 | 0.42 ± 0.01 | 0.13 ± 0.03 | 0.40 ± 0.05 | 151.4 ± 7.31  | ND | 174.11 ± 7.0  | ND |
| A473 | 0.10 ± 0.01 | 0.37 ± 0.03 | 0.19 ± 0.01 | 0.35 ± 0.03 | 242.0 ± 32.02 | ND | 278.30 ± 7.3  | ND |
| A474 | 0.23 ± 0.02 | 0.33 ± 0.01 | 0.22 ± 0.04 | 0.29 ± 0.02 | 108.9 ± 2.55  | ND | 125.24 ± 15.4 | ND |
| A479 | 0.46 ± 0.03 | 0.47 ± 0.01 | 0.35 ± 0.03 | 0.45 ± 0.04 | 59.6 ± 2.73   | ND | 68.54 ± 11.1  | ND |
| A483 | 0.29 ± 0.05 | 0.49 ± 0.02 | 0.26 ± 0.01 | 0.41 ± 0.05 | 168.3 ± 2.44  | ND | 193.55 ± 5.1  | ND |
| A486 | 0.32 ± 0.07 | 0.33 ± 0.01 | 0.24 ± 0.02 | 0.30 ± 0.01 | 87.1 ± 1.44   | ND | 100.17 ± 6.5  | ND |
| A491 | 0.19 ± 0.01 | 0.45 ± 0.02 | 0.16 ± 0.01 | 0.39 ± 0.03 | 241.1 ± 7.15  | ND | 277.27 ± 6.7  | ND |

<sup>a</sup> ND, not detectable.

**TABLE S5** *G. mellonella* killing by selected *A. baumannii* strains at 24, 48, 72 and 96 h after inoculation.

| Strain                  | LD <sub>50</sub> (CFU/larva) |                   |                   |                   | LD <sub>90</sub> (CFU/larva) |                   |                   |                   |
|-------------------------|------------------------------|-------------------|-------------------|-------------------|------------------------------|-------------------|-------------------|-------------------|
|                         | 24 h                         | 48 h              | 72 h              | 96 h              | 24 h                         | 48 h              | 72 h              | 96 h              |
| ATCC 19606 <sup>T</sup> | 2×10 <sup>8</sup>            | 9×10 <sup>7</sup> | 5×10 <sup>7</sup> | 4×10 <sup>7</sup> | 5×10 <sup>8</sup>            | 3×10 <sup>8</sup> | 9×10 <sup>7</sup> | 7×10 <sup>7</sup> |
| ATCC 17978              | 4×10 <sup>6</sup>            | 2×10 <sup>6</sup> | 2×10 <sup>6</sup> | 2×10 <sup>6</sup> | 3×10 <sup>7</sup>            | 7×10 <sup>6</sup> | 5×10 <sup>6</sup> | 5×10 <sup>6</sup> |
| RUH 5875                | 9×10 <sup>6</sup>            | 3×10 <sup>6</sup> | 2×10 <sup>6</sup> | 2×10 <sup>6</sup> | 4×10 <sup>8</sup>            | 5×10 <sup>7</sup> | 8×10 <sup>6</sup> | 8×10 <sup>6</sup> |
| AYE                     | 6×10 <sup>6</sup>            | 2×10 <sup>6</sup> | 1×10 <sup>6</sup> | 1×10 <sup>6</sup> | 2×10 <sup>7</sup>            | 5×10 <sup>6</sup> | 5×10 <sup>6</sup> | 5×10 <sup>6</sup> |
| ACICU                   | 6×10 <sup>6</sup>            | 3×10 <sup>6</sup> | 2×10 <sup>6</sup> | 9×10 <sup>5</sup> | 1×10 <sup>7</sup>            | 1×10 <sup>7</sup> | 5×10 <sup>6</sup> | 5×10 <sup>6</sup> |
| 50C                     | 5×10 <sup>5</sup>            | 3×10 <sup>5</sup> | 2×10 <sup>5</sup> | 2×10 <sup>5</sup> | 1×10 <sup>7</sup>            | 1×10 <sup>6</sup> | 8×10 <sup>5</sup> | 8×10 <sup>5</sup> |
| A371                    | 1×10 <sup>5</sup>            | 1×10 <sup>5</sup> | 1×10 <sup>5</sup> | 1×10 <sup>5</sup> | 9×10 <sup>5</sup>            | 3×10 <sup>5</sup> | 3×10 <sup>5</sup> | 3×10 <sup>5</sup> |
